# Supplementary material for: Lipids, Lipoprotein Distribution and Nutritional Parameters over the Ramadan Period in Hemodialysis Patients
Source: PubMed Central journal article supplement (PMC6769954; doi:10.3390/nu11092225), 2019-09-14
Supplement: nutrients-11-02225-s001.pdf [file nutrients-11-02225-s001.pdf]

**Table S1: Biochemical Assessment**

| Time                     | Pre-Ramadan               |                             | 1 month-post               | 2 months-post              |
|--------------------------|---------------------------|-----------------------------|----------------------------|----------------------------|
|                          | (T-1)                     | Ramadan (TR)                | Ramadan (T1)               | Ramadan (T2)               |
| Kt/V                     | 1.34 ± 0.27(30)           | 1.34 ± 0.30(34)             | 1.36 ± 0.35(30)            | 1.38 ± 0.32(34)            |
| Calcium (mg/dl)          | 8.7 ± 0.93(45)            | 8.7 ± 0.73(45)              | 8.8 ± 0.77(45)             | 8.9 ± 0.79(43)             |
| Ferritin (ng/ml)         | 1206 ± 1036(39)           | 1221.9 ± 1199(40)           | 1101.4 ± 514(33)           | 1218 ± 1136(40)            |
| Glucose - Random (mg/dl) | 129 ± 63(42)              | 138 ± 90(42)                | 155 ± 135(41) <sup>a</sup> | 127 ± 79 (42) <sup>a</sup> |
| Vitamin D (ng/ml)        | 24 ± 8.1(40) <sup>a</sup> | 29.6 ± 9.5(41) <sup>a</sup> | No data available          | 26.3 ± 9.6(42)             |
| Phosphorus (mg/dl)       | 5.5 ± 2.02(45)            | 6.0 ± 2.61(45)              | 5.9 ± 2.39(45)             | 5.8 ± 1.99(43)             |

Values are reported as mean± SD for the number in the parenthesis. Values in a given row, sharing a common superscript were significantly different from each other (p<0.05).
